# Supplementary material for: Self-assembly of monodispersed silica nano-spheres with a closed-pore mesostructure
Source: Royal Society of Chemistry journal article supplement (doi:10.1039/c2jm30865g), 2012-01-01
Supplement: c2jm30865g.pdf [file c2jm30865g.pdf]

# Self-assembly of Monodispersed Silica Nano-spheres with a Closed-Pore Mesostructure

Xiaodan Huang<sup>a,b</sup>, Liang Zhou<sup>a</sup>, Chengzhong Yu<sup>b\*</sup>, Dongyuan Zhao<sup>a\*</sup>

[<sup>a</sup>] Department of Chemistry and Shanghai Key Laboratory of Molecular Catalysis and Innovative

5 Materials, Fudan University, Shanghai 200433, P. R. China.

[<sup>b</sup>] ARC Centre of Excellence for Functional Nanomaterials and Australian Institute for Bioengineering and Nanotechnology, The University of Queensland, Brisbane, QLD 4072, Australia

\*Address corresponding to: [dyzhao@fudan.edu.cn](mailto:dyzhao@fudan.edu.cn) (ZDY), [c.yu@uq.edu.au](mailto:c.yu@uq.edu.au) (CZY).

## 10 Electronic Supplementary Information

### The synthesis of MCM-41

CTAB (0.2 g) was dissolved in water (96 ml) with stirring at room temperature. NaOH (0.7 ml, 2 M) was added into the solution. Then, the temperature of the solution was raised and kept at 80 °C. TEOS (1.25 g) was added into the 15 surfactant solution under stirring and the mixture was allowed to react for 2 h. The resulting product was collected by filtration and dried at room temperature. The final sample was obtained by calcination at 700 °C for 5 h.

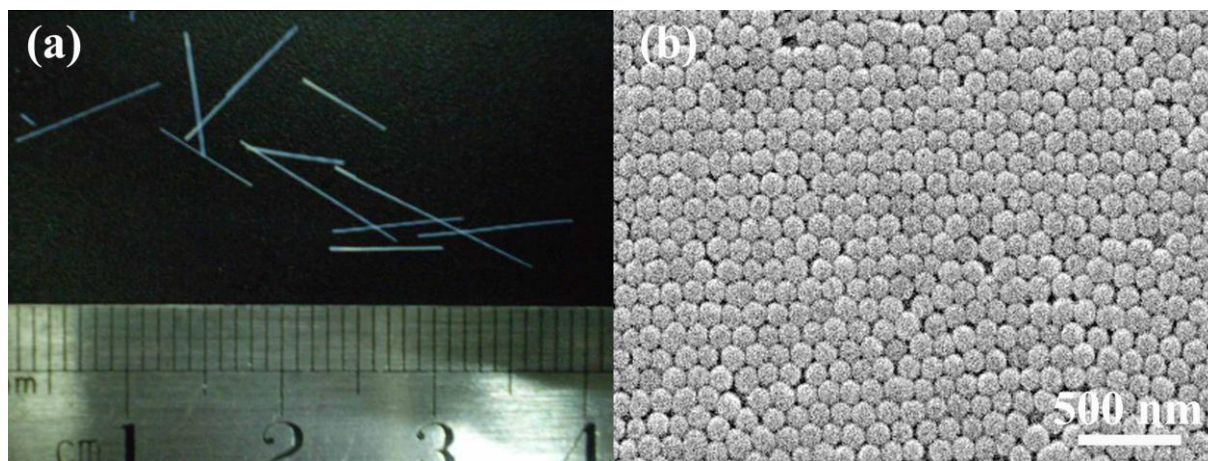

**Figure S-1.** (a) A digital camera image and (b) SEM image of the rod-like superstructures arrayed from CSSs.

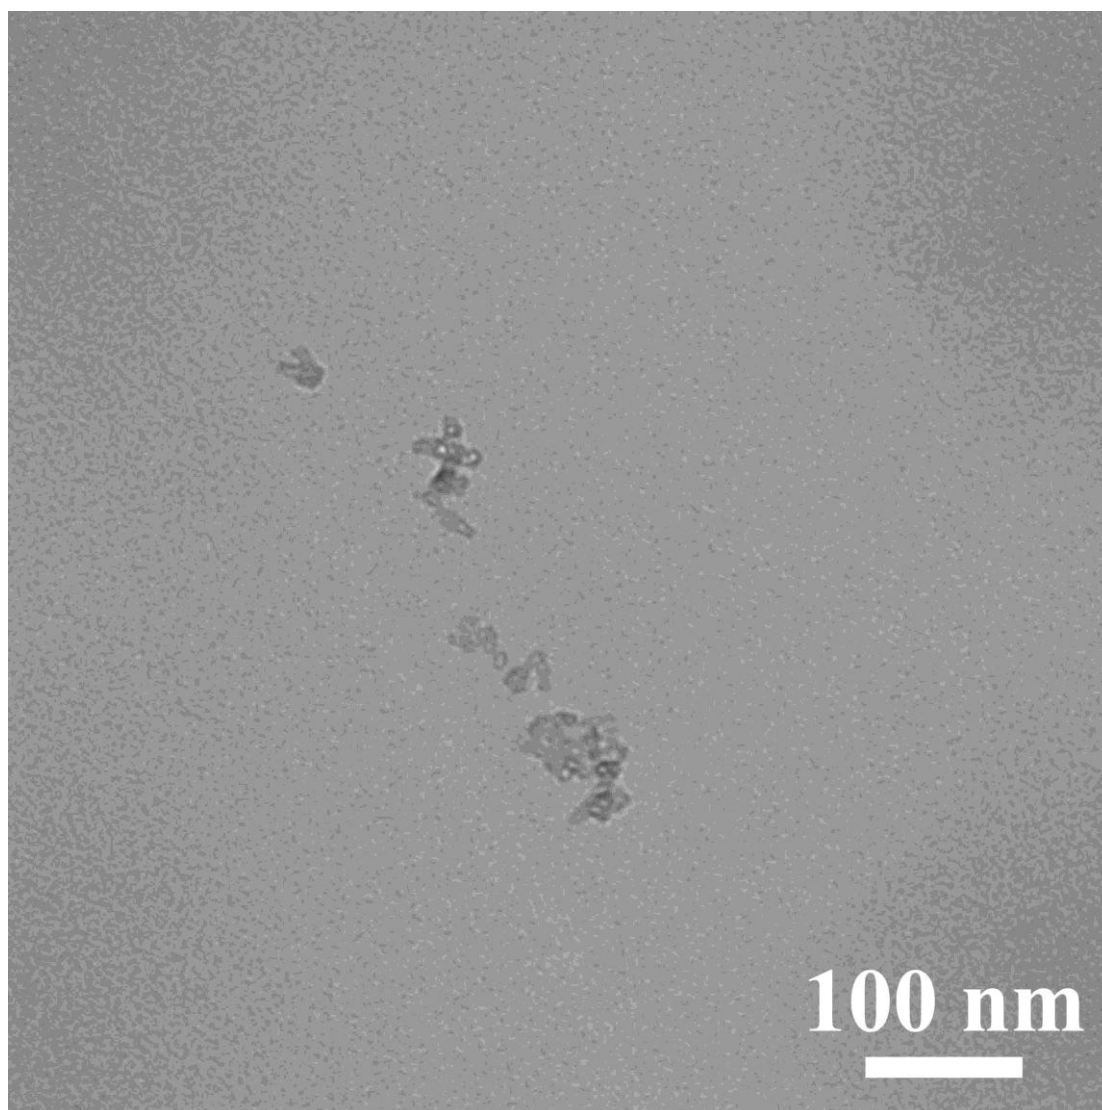

**Figure S-2.** The cryo-TEM image of the solution after the adding of TEOS and reacting for 15 min.
